# Supplementary material for: Listeria Contamination in Milk-Processing Chain and Proficiency in Listeria monocytogenes Decontamination of Small-Scale Milk Retailers
Source: Hindawi journal article supplement (doi:10.1155/2024/6263938), 2024-01-25
Supplement: f1 [file 6263938.f1.docx]

Questionnaire for the study entitle:

**“Listeria species contamination in the milk-processing chain and decontamination proficiency of small-scale milk retailers”**

Respondent: SUPPADA KANANUB,

Department of Veterinary Public Health, Faculty of Veterinary Medicine, Kasetsart University

Tel. 083-9994630

Retailer’s name………………………………………… Date…………………………

Province…………………………. Location…………………………………

Sex O Male O Female Age…………………….

**Please answer the questions truthfully**

How often have you ordered raw milk?.............................................................................................

How many liters have you bought per order? ………….……………………………………….….

Where is the source of raw milk? ……………………………………….………….………….…..

How have you kept the unprocessed milk? ………………………….………………………….….

How have you treated milk before sale? ………………………….………………………………..

How have you cleaned equipment? ………………………………………………………………..

Do you wear face mask during processing milk? …………………………………………..….…..

Do you wear gloves during processing milk? ……………………………………………..……….

What is standard process for preparing milk safe to drink?...............................................................

**Please select Yes/No**

**Yes No**

Do you know pasteurization process? O O

Please explain………………………………………………………

Can raw milk contaminate with harmful bacteria? O O

Can raw milk/improper processed-milk consumption cause human health risk? O O

Can microbe in milk be a cause of diarrhea? O O

Can microbe in milk be a cause of headache? O O

Can microbe in milk be a cause of fever? O O

Can microbe in milk be a cause of vomit? O O

Can microbe in milk be a cause of neurological sign? O O

Does the seller wear the mask during processing milk? O O

Does the seller wear the glove during processing milk? O O

Have you checked milk temperature during process? O O

Do you treat your product by pasteurization method? O O

Do you clean the cooking area every day? O O

Do you clean the cooking equipment after using? O O

Please explain………………………………………………………

I consent to give the data for this study.

Signature……………………………
